# Supplementary material for: Current Opportunities for Targeting Dysregulated Neurodevelopmental Signaling Pathways in Glioblastoma
Source: MDPI journal article supplement (doi:10.3390/cells11162530), 2022-08-15
Supplement: s1 [file s1]

Supplementary Table S1. Stratification of GBM into molecular subtypes and characteristics of subtypes.

| Stratification                                                        | Subtypes                                    | Characteristics of the subtype                                                                                                                                                  |
|-----------------------------------------------------------------------|---------------------------------------------|---------------------------------------------------------------------------------------------------------------------------------------------------------------------------------|
| Based on IDH1/2 mutations                                             | <i>IDH wild-type GBM</i>                    | TERT promoter, PTEN, TP53, PIK3CA, PIK3R1, NF1, H3F3A mutation                                                                                                                  |
|                                                                       |                                             | EGFR, PDGFRA, MET, CDK4, CDK6, MDM2, MDM4 amplification                                                                                                                         |
|                                                                       |                                             | EGFRvIII deletion                                                                                                                                                               |
|                                                                       |                                             | MGMT promoter methylation                                                                                                                                                       |
|                                                                       |                                             | trisomy 7, 7q gain, monosomy 10, double minute chromosomes                                                                                                                      |
|                                                                       | <i>IDH mutant GBM</i>                       | IDH1 or IDH2, TP53, ATRX mutation                                                                                                                                               |
|                                                                       |                                             | homozygous CDKN2A/p14 <sup>ARF</sup> deletion                                                                                                                                   |
|                                                                       |                                             | MGMT promoter methylation                                                                                                                                                       |
| Based on the 2016 WHO classification and cIMPACT- NOW recommendations | <i>GBM</i>                                  | no mutations in <i>IDH</i> genes                                                                                                                                                |
|                                                                       |                                             | No mutations in histone <i>H3</i> genes                                                                                                                                         |
|                                                                       |                                             | microvascular proliferation, necrosis and/or molecular features, including mutation in <i>TERT</i> promoter, <i>EGFR</i> gene amplification and/or +7/–10 cytogenetic signature |
|                                                                       | <i>IDH- mutant astrocytoma, WHO grade 4</i> | homozygous deletion of <i>CDKN2A/B</i> locus                                                                                                                                    |
|                                                                       |                                             | mutations in <i>IDH</i> genes                                                                                                                                                   |
|                                                                       |                                             | loss of nuclear <i>ATRX</i>                                                                                                                                                     |
| Based on gene expression profiles                                     | <i>Proneural</i>                            | <i>PDGFRA</i> alterations                                                                                                                                                       |
|                                                                       |                                             | point mutations in <i>IDH1</i>                                                                                                                                                  |
|                                                                       |                                             | <i>TP53</i> mutations and loss of heterozygosity                                                                                                                                |
|                                                                       |                                             | chromosome 7 amplification paired with chromosome 10 loss                                                                                                                       |
|                                                                       |                                             | high expression of oligodendrocytic development genes such as <i>PDGFRA</i> , <i>NKX2-2</i> and <i>OLIG2</i>                                                                    |
|                                                                       |                                             | <i>PIK3CA/PIK3R1</i> mutations                                                                                                                                                  |
|                                                                       |                                             | expression of proneural development genes such as <i>SOX</i> genes, <i>DCX</i> , <i>DLL3</i> , <i>ASCL1</i> and <i>TCF4</i>                                                     |
|                                                                       | <i>Classical</i>                            | EGFR amplification                                                                                                                                                              |
|                                                                       |                                             | point or vIII EGFR mutation                                                                                                                                                     |
|                                                                       |                                             | lack of TP53 mutations                                                                                                                                                          |
|                                                                       |                                             | CDKN2A homozygous deletion                                                                                                                                                      |
|                                                                       |                                             | chromosome 7 amplification paired with chromosome 10 loss                                                                                                                       |
|                                                                       |                                             | affected RB pathway                                                                                                                                                             |

|                                                                                                      |                    |                                                                                                                                                                                                              |
|------------------------------------------------------------------------------------------------------|--------------------|--------------------------------------------------------------------------------------------------------------------------------------------------------------------------------------------------------------|
|                                                                                                      |                    | high expression of <i>NES</i>                                                                                                                                                                                |
|                                                                                                      |                    | high expression of the Notch and SHH pathways                                                                                                                                                                |
|                                                                                                      | <i>Mesenchymal</i> | <i>NF1</i> , <i>PTEN</i> mutations                                                                                                                                                                           |
|                                                                                                      |                    | hemizygous deletions of a region at 17q11.2, containing the <i>NF1</i> gene                                                                                                                                  |
|                                                                                                      |                    | high frequency of <i>NF1</i> mutation/deletion                                                                                                                                                               |
|                                                                                                      |                    | high expression of mesenchymal markers ( <i>CHI3L1</i> , <i>MET</i> )                                                                                                                                        |
|                                                                                                      |                    | increased NF-kB pathway                                                                                                                                                                                      |
|                                                                                                      | <i>Neural</i>      | expression of neuronal markers (such as <i>NEFL</i> , <i>GABRA1</i> , <i>SYT1</i> , <i>SLC12A5</i> )                                                                                                         |
| <b>Based on gene expression and DNA methylation profiles</b>                                         | <i>Proneural</i>   | upregulation of genes enriched in cell division pathways, downregulation of genes enriched in inflammatory pathways                                                                                          |
|                                                                                                      | <i>Classical</i>   | upregulation of genes of ErbB receptor tyrosine kinase family signaling pathway and cell fate commitment, downregulation of genes of immune system-related pathways                                          |
|                                                                                                      | <i>Mesenchymal</i> | higher expression of genes in the ERK1/2 cascade, activation of pathways associated with immunity and inflammation processes, downregulation of DNA repair genes and genes enriched in RNA splicing pathways |
| <b>Based on integrative approach combining scRNA-seq, TCGA deconvolution and experimental models</b> | <i>NPC-like 1</i>  | expression of <i>SOX4</i> , <i>DCX</i> , <i>CD24</i> , <i>DLL3</i> , <i>SOX11</i>                                                                                                                            |
|                                                                                                      | <i>NPC-like 2</i>  | expression of <i>RND3</i> , <i>SOX11</i> , <i>DCX</i> , <i>CD24</i> , <i>STMN4</i> , <i>STMN2</i> , <i>DLX5</i> , <i>DLX6-AS1</i>                                                                            |
|                                                                                                      | <i>OPC-like</i>    | expression of <i>PLP1</i> , <i>ALCAM</i> , <i>OLIG1</i> , <i>OMG</i> , <i>PLLP</i>                                                                                                                           |
|                                                                                                      | <i>AC-like</i>     | expression of <i>CST3</i> , <i>GFAP</i> , <i>S100B</i> , <i>HOPX</i> , <i>SLC1A3</i> , <i>MLC1</i>                                                                                                           |
|                                                                                                      | <i>MES-like 1</i>  | expression of <i>VIM</i> , <i>ANXA1</i> , <i>ANXA2</i> , <i>CHI3L1</i> , <i>CD44</i>                                                                                                                         |
|                                                                                                      | <i>MES-like 2</i>  | expression of <i>DDIT3</i> , <i>ENO2</i> , <i>VIM</i> , <i>ADM</i> , <i>LDHA</i> , <i>HILPDA</i>                                                                                                             |
| <b>Cell lineage-based stratification</b>                                                             | <i>type I</i>      | expression of <i>EGFR</i> and <i>SOX9</i>                                                                                                                                                                    |
|                                                                                                      |                    | expression of <i>SLC1A3</i> gene                                                                                                                                                                             |
|                                                                                                      |                    | enrichment of biological processes that reflect astrocyte differentiation and cell migration                                                                                                                 |
|                                                                                                      | <i>type II</i>     | Expression of <i>ERBB3</i> and <i>SOX10</i>                                                                                                                                                                  |
|                                                                                                      |                    | enrichment of biological processes that reflect the myelination, gliogenesis, and oligodendrocyte differentiation                                                                                            |
|                                                                                                      |                    | increased amplification of genes in the vicinity of PDGFRA and KIT locus                                                                                                                                     |

|                                                                                            |                              |                                                                                                                                           |
|--------------------------------------------------------------------------------------------|------------------------------|-------------------------------------------------------------------------------------------------------------------------------------------|
|                                                                                            |                              | expression of <i>FA2H</i> gene                                                                                                            |
| <b>Based on results of single-cell RNA sequencing</b>                                      | <i>developmental state</i>   | high proliferation                                                                                                                        |
|                                                                                            |                              | expression of genes encoding products associated with neurodevelopmental programs                                                         |
|                                                                                            | <i>injury response state</i> | mesenchymal-like gene-expression signatures                                                                                               |
|                                                                                            |                              | expression of genes encoding products indicative of hypoxia, reactive astrocytes, and wound-healing response                              |
| <b>Based on immunohistochemical analysis, DNA copy number and DNA methylation profiles</b> | <i>OPC type</i>              | expression of PDGFRA, p16, p53 and OLIG2                                                                                                  |
|                                                                                            |                              | IDH1 and TP53 mutations                                                                                                                   |
|                                                                                            |                              | methylation of the MGMT promoter                                                                                                          |
|                                                                                            | <i>DOC type</i>              | OLIG2 expression                                                                                                                          |
|                                                                                            |                              | 1p/19q co-deletion                                                                                                                        |
|                                                                                            |                              | <i>CDKN2A</i> loss                                                                                                                        |
|                                                                                            | <i>AsMes type</i>            | strong expressions of nestin, CD44, GFAP and podoplanin                                                                                   |
|                                                                                            |                              | low levels of Olig2, IDH1-R132H, p53, p16, PDGFRA                                                                                         |
|                                                                                            | <i>Mixed type</i>            | frequent expressions of p16, EGFR, Hes-1, p53                                                                                             |
|                                                                                            |                              | Activation of Notch-Hes-1 pathway                                                                                                         |
|                                                                                            |                              | EGFR amplification                                                                                                                        |
|                                                                                            |                              | low frequency of <i>CDKN2A</i> loss                                                                                                       |
| <b>Based on growth factors and cytokines expression profiles</b>                           | <i>type I</i>                | Expression of CD44 and GFAP                                                                                                               |
|                                                                                            |                              | high expression of TAC1, CCK, CHGA, PNOC, SST, FGF17, CHGB, and NPY                                                                       |
|                                                                                            | <i>type II</i>               | enriched for the genes down-regulated by KRAS signaling                                                                                   |
|                                                                                            |                              | high expression of SAA1/2, RETN, CXCL8                                                                                                    |
|                                                                                            | <i>type III</i>              | enriched in gene sets of epithelial-mesenchymal transition, KRAS signaling up, mTORC1 signaling, P53 pathway, and PI3K/AKT/mTOR signaling |
|                                                                                            |                              | high expression of PDGFRA, ESM1, CS                                                                                                       |
|                                                                                            |                              | enrichment in the two cell cycle-related gene sets (E2F targets and G2M checkpoint PG5)                                                   |

This summary is based on the previously reported publications listed in the Manuscript, subsection Molecular subtypes of glioblastoma. TERT - telomerase reverse transcriptase; PTEN - phosphatase and tensin homolog on chromosome 10; TP53 - tumor protein 53; PIK3CA - phosphatidylinositol 3-kinase, catalytic, alpha; PIK3R1 - phosphatidylinositol 3-kinase regulatory subunit 1; NF1 – neurofibromatosis type 1; H3F3A - histone H3 family 3A; EGFR – epidermal growth factor receptor; PDGFRA - platelet-derived growth factor receptor A; MET - hepatocyte growth factor receptor; CDK4 - cyclin dependent kinase 4; CDK6 - cyclin dependent kinase 6; MDM2 – mouse double minute 2; MDM4 - mouse double minute 4; EGFRvIII -

epidermal growth factor receptor variant III; MGMT - O6-methylguanine-DNA methyltransferase; IDH1 - isocitrate dehydrogenase 1; IDH2 - isocitrate dehydrogenase 2; ATRX – nuclear alpha-thalassemia/mental retardation syndrome, X-linked; CDKN2A - cyclin-dependent kinase inhibitor 2A; NKX2-2 - NK2 Homeobox 2; OLIG2 - Oligodendrocyte Transcription Factor 2; PIK3CA - phosphatidylinositol-4,5-bisphosphate 3-Kinase catalytic subunit alpha; PIK3R1 - Phosphoinositide-3-Kinase Regulatory Subunit 1; SOX - Sry-related HMG box; DCX – doublecortin; DLL3 - Delta Like Canonical Notch Ligand 3; ASCL1 - Achaete-Scute Family BHLH Transcription Factor 1; TCF4 - transcription Factor 4; NES – nestin; CHI3L1 - Chitinase 3 Like 1; NEFL - neurofilament light chain; GABRA1 - Gamma-Aminobutyric Acid Type A Receptor Subunit Alpha1; SYT1 - synaptotagmin 1; SLC12A5 - solute carrier family 12 member 5; RND3 - Rho Family GTPase 3; ERBB3 - ErbB receptor tyrosine kinase 3; SLC1A3 - solute carrier family 1 member 3; KIT - KIT Proto-Oncogene, Receptor Tyrosine Kinase; FA2H - Fatty Acid 2-Hydroxylase; STMN4 - Stathmin 4; STMN2 - Stathmin 2; DLX5 - Distal-Less Homeobox 5; DLX6-AS1 - DLX6 Antisense RNA 1; PLP1 - Proteolipid Protein 1; ALCAM - Activated Leukocyte Cell Adhesion Molecule; OLIG1 - oligodendrocyte transcription factor 1; OMG - Oligodendrocyte Myelin Glycoprotein; PLLP – Plasmolipin; CST3 - Cystatin C; GFAP - glial fibrillary acidic protein; S100B - S100 Calcium Binding Protein B; HOPX - HOP Homeobox; MLC1 - Modulator Of VRAC Current 1; VIM – vimentin; ANXA1 - Annexin A1; ANXA2 - Annexin A2; DDIT3 - DNA Damage Inducible Transcript 3; ENO2 - Enolase 2; ADM – Adrenomedullin; LDHA - Lactate Dehydrogenase A; HILPDA - Hypoxia Inducible Lipid Droplet Associated; Hes-1 - Hes Family BHLH Transcription Factor 1; TAC1 - tachykinin precursor 1; CCK – Cholecystokinin; CHGA - Chromogranin A; PNOC – prepronociceptin; SST – somatostatin; FGF17 - fibroblast growth factor 17; CHGB - chromogranin B; NPY - neuropeptide Y; SAA1/2 - serum amyloid A1/2; RETN – resistin; CXCL8 - C-X-C Motif Chemokine Ligand 8; ESM1 - endothelial cell specific molecule 1; CS - citrate synthase.
